# Supplementary material
Source: PubMed Central journal article supplement (PMC9638857)

### Source Data for Fig 3A

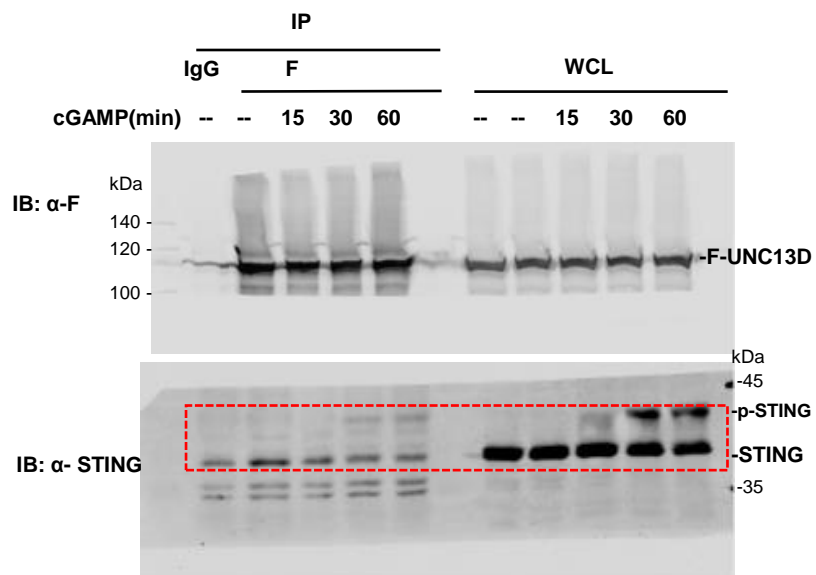

### Source Data for Fig 3E

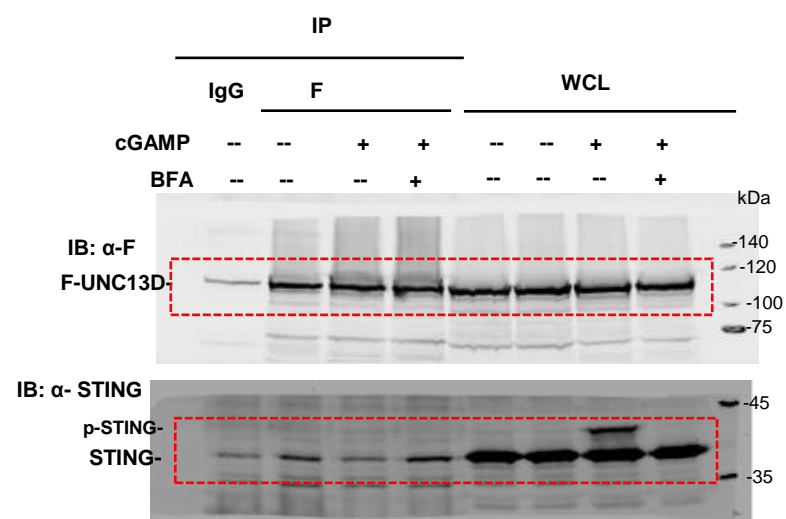

### Source Data for Fig 3F

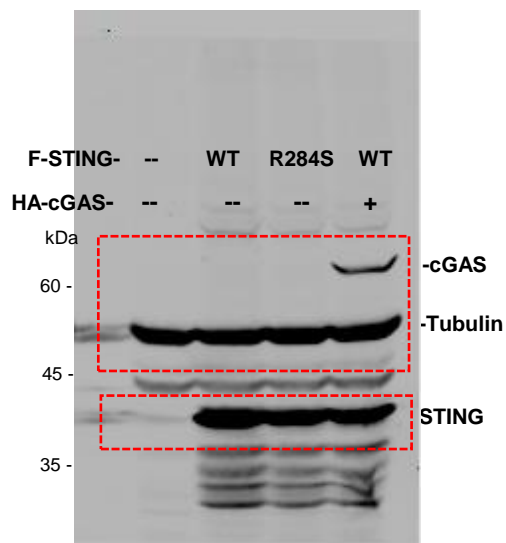

### Source Data for Fig 3I

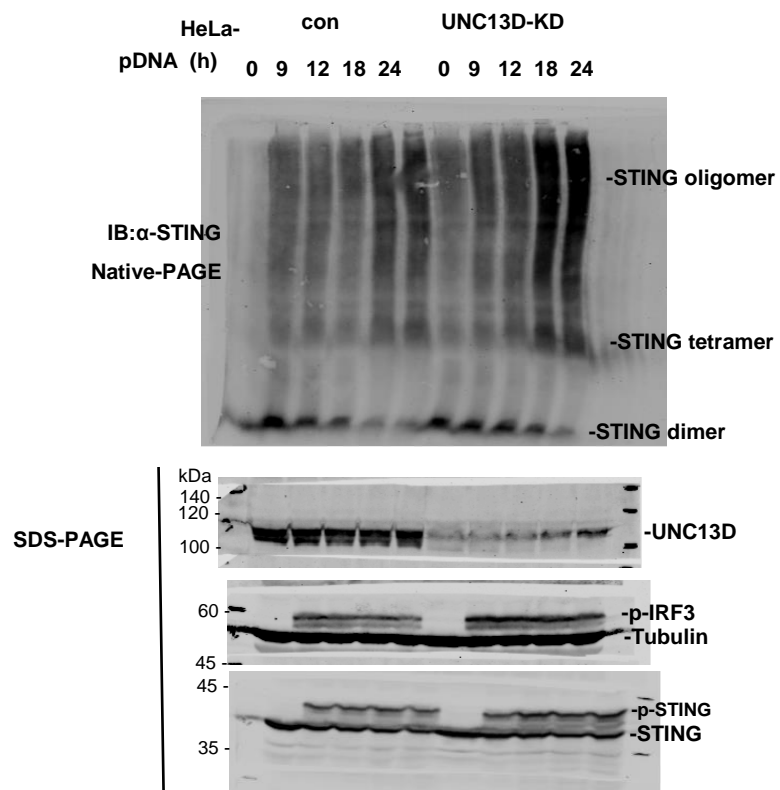

SDS-PAGE

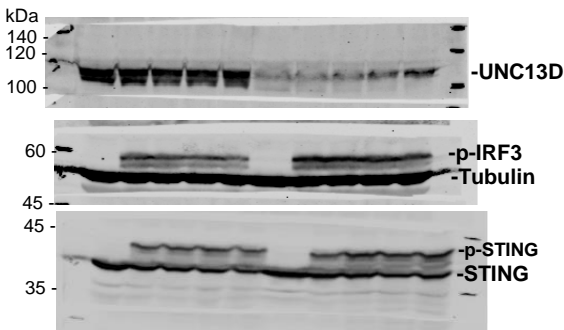

## Source Data for Fig 3J

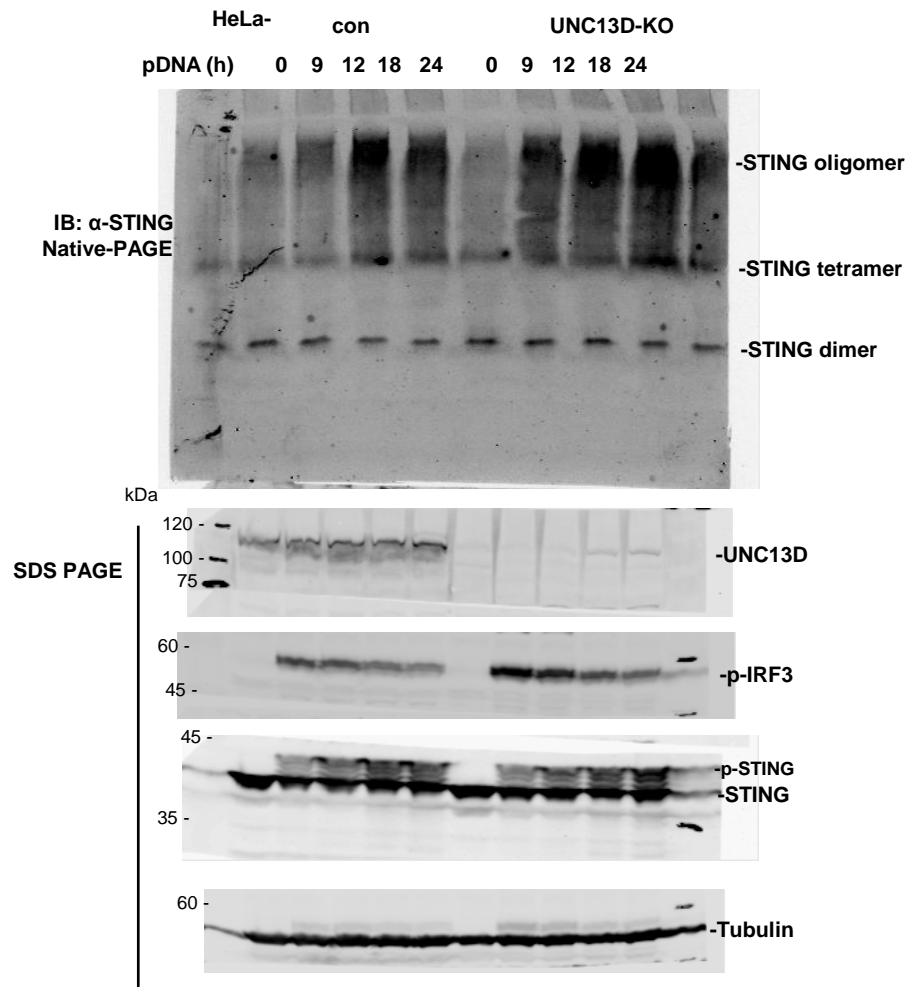

## Source Data for Fig 3H

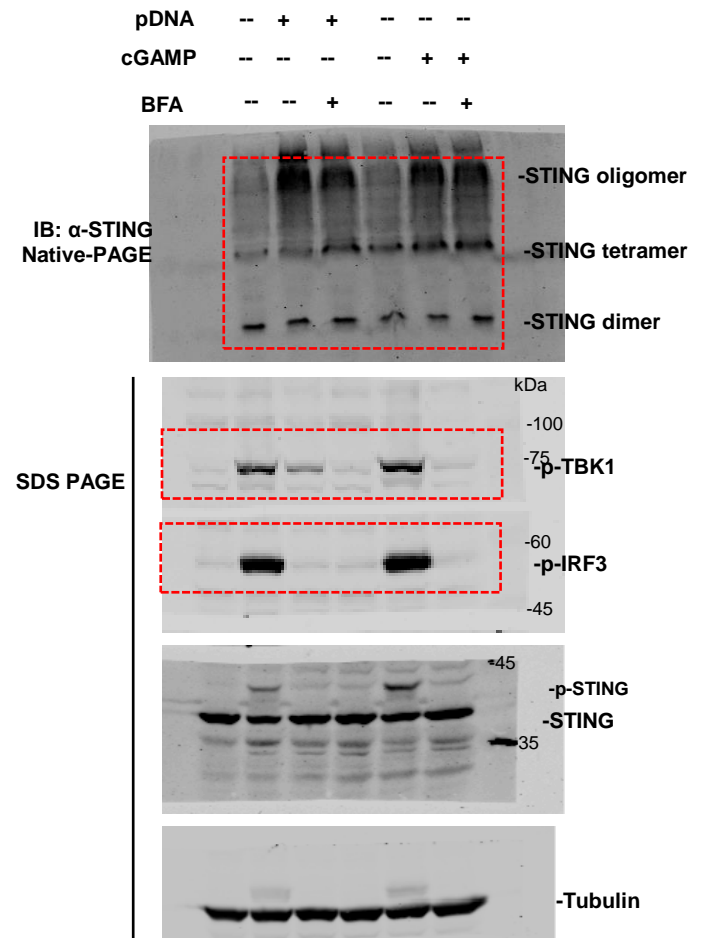

Supplement: EMBR-23-e55099-s005.pdf [file EMBR-23-e55099-s005.pdf]
