# Supplementary material
Source: PubMed Central journal article supplement (PMC9638857)

## Source Data for Fig 4B

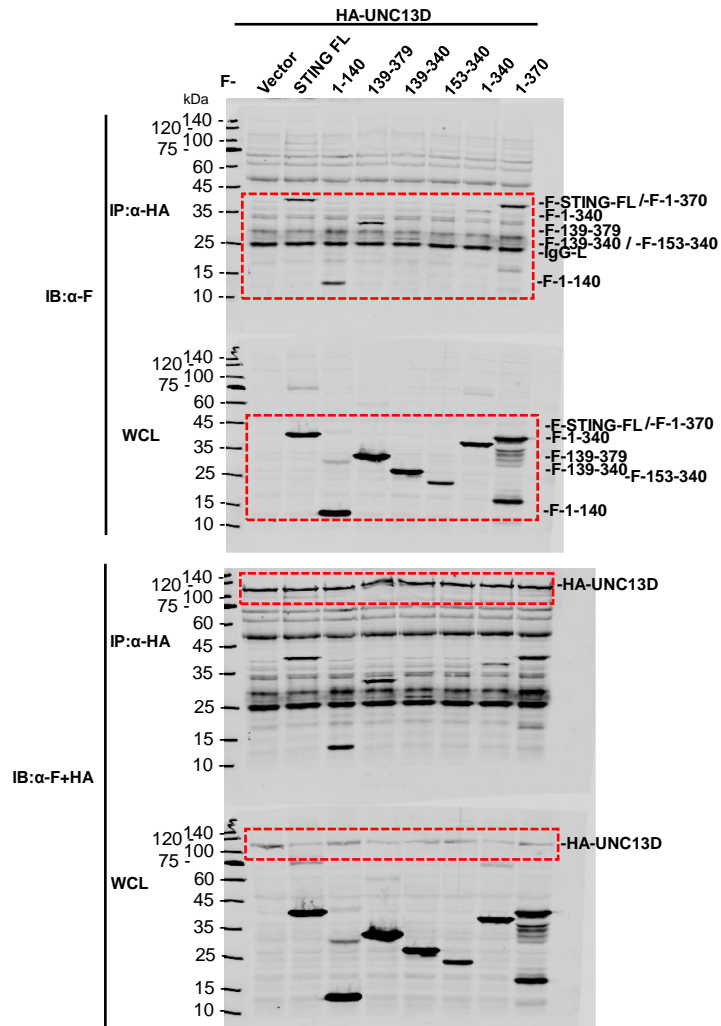

## Source Data for Fig 4D

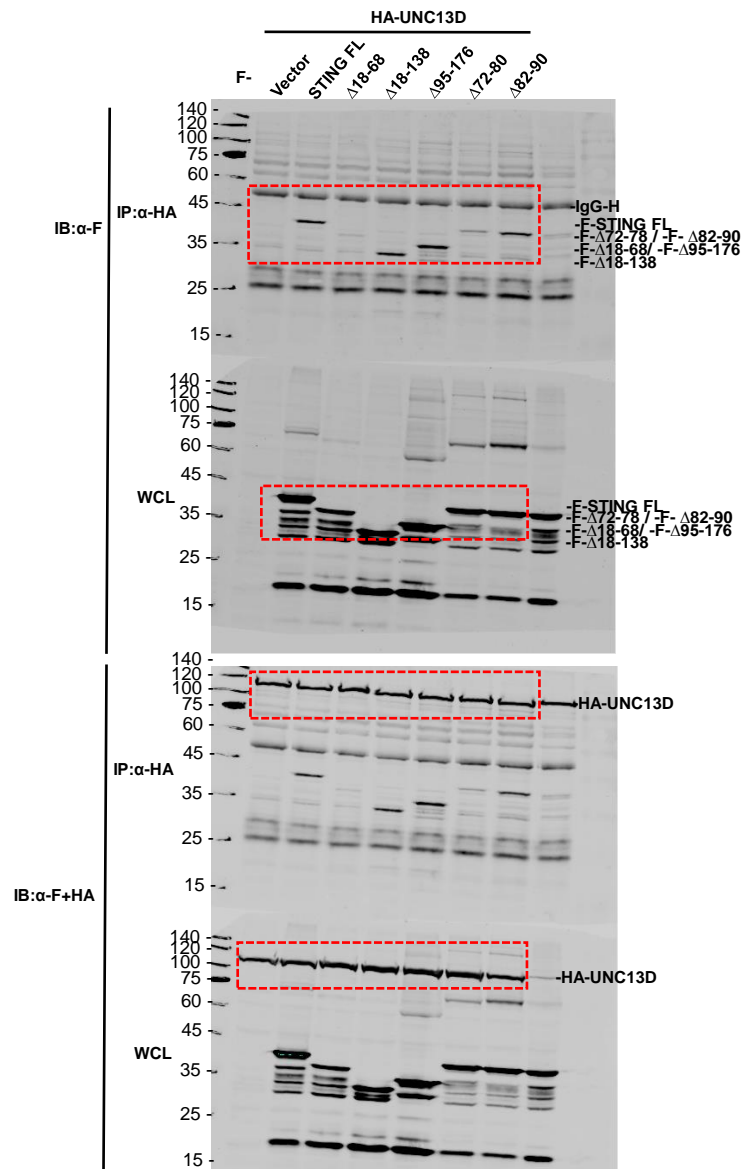

## Source Data for Fig 4F

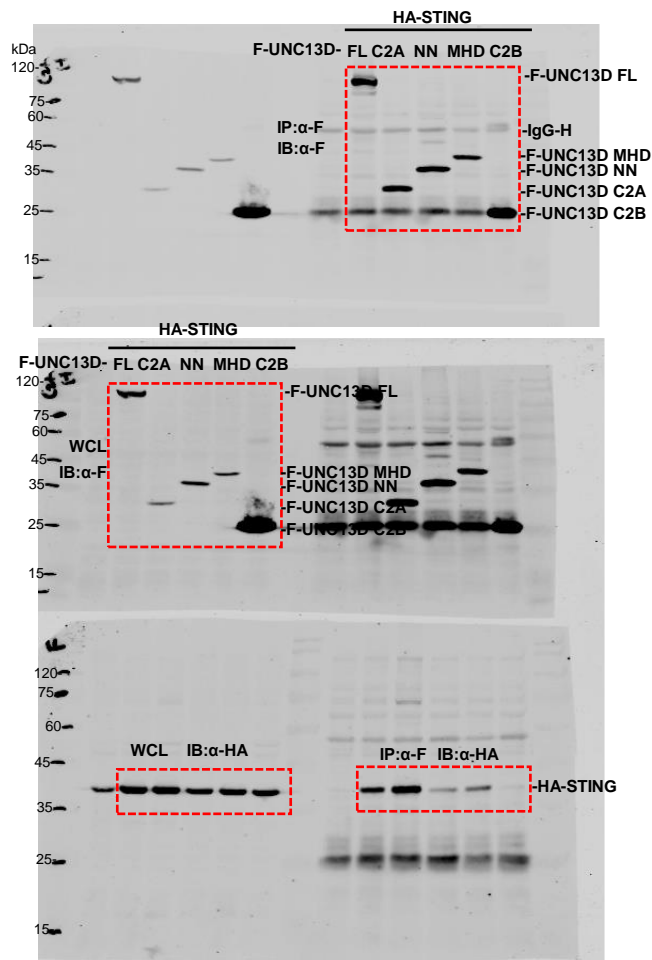

## Source Data for Fig 4H

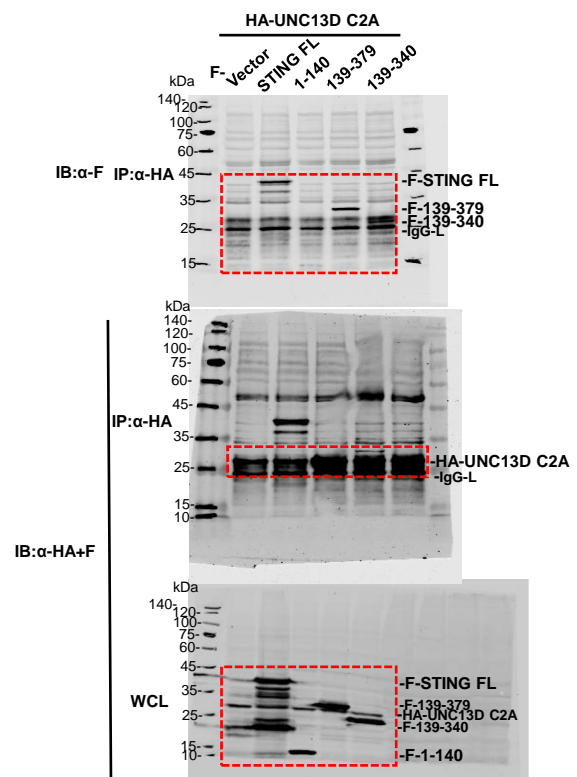

## Source Data for Fig 4I

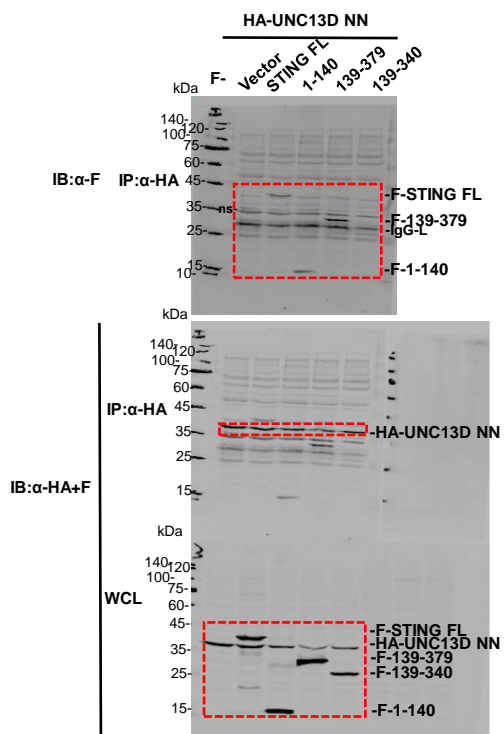

## Source Data for Fig 4J

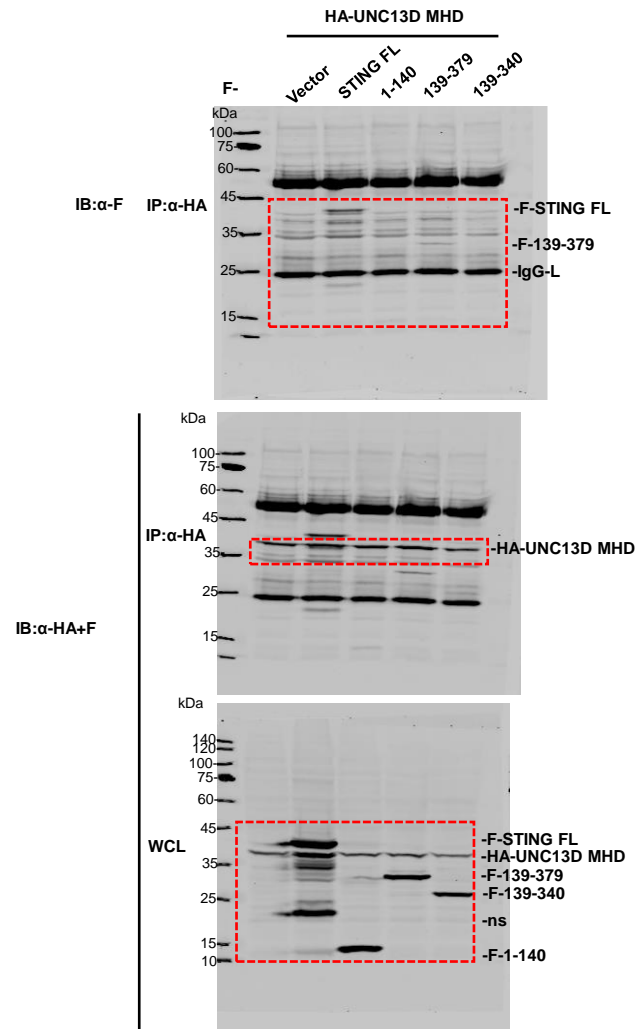

Supplement: EMBR-23-e55099-s008.pdf [file EMBR-23-e55099-s008.pdf]
