# Supplementary material
Source: PubMed Central journal article supplement (PMC9638857)

## Source Data for Fig 1A

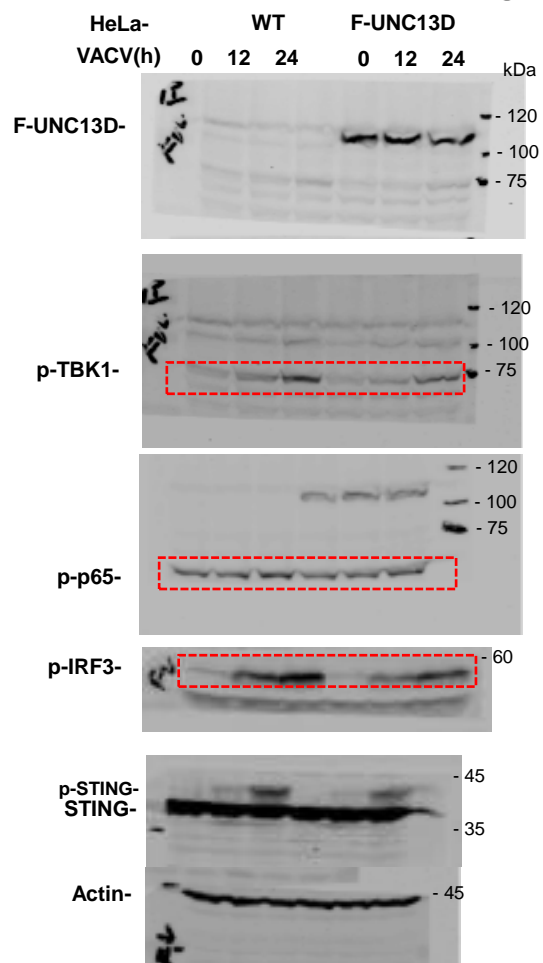

## Source Data for Fig 1B

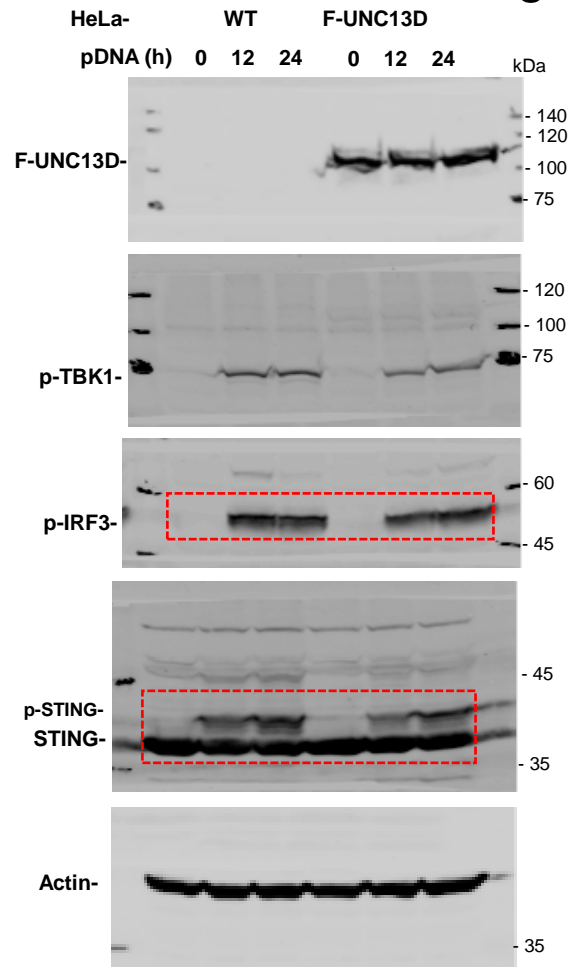

## Source Data for Fig 1C

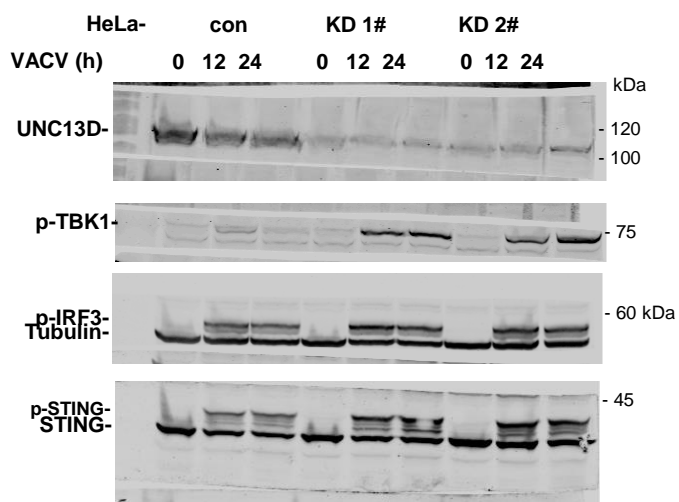

## Source Data for Fig 1D

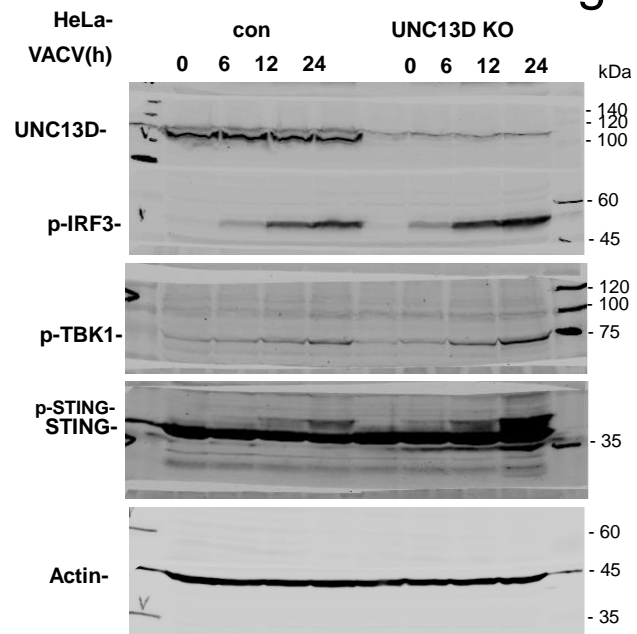

## Source Data for Fig 1E

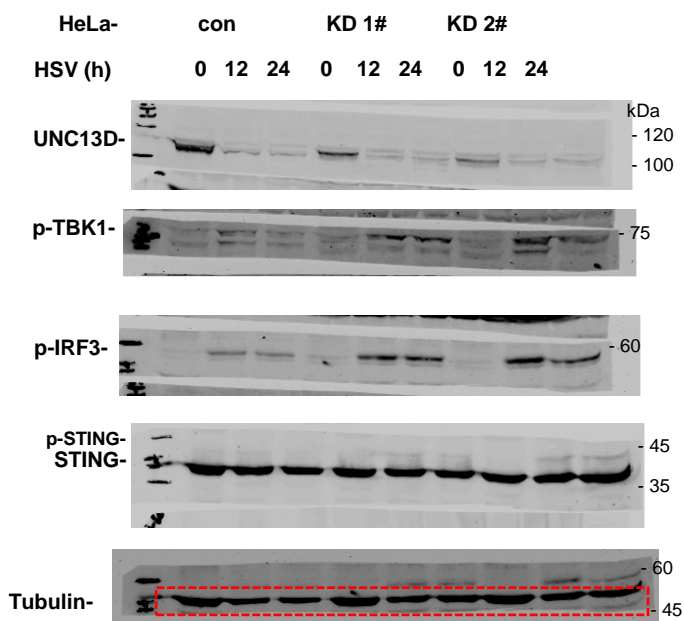

## Source Data for Fig 1F

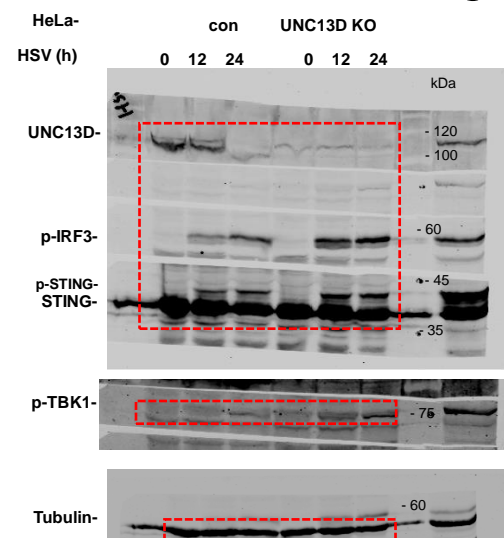

## Source Data for Fig 1G

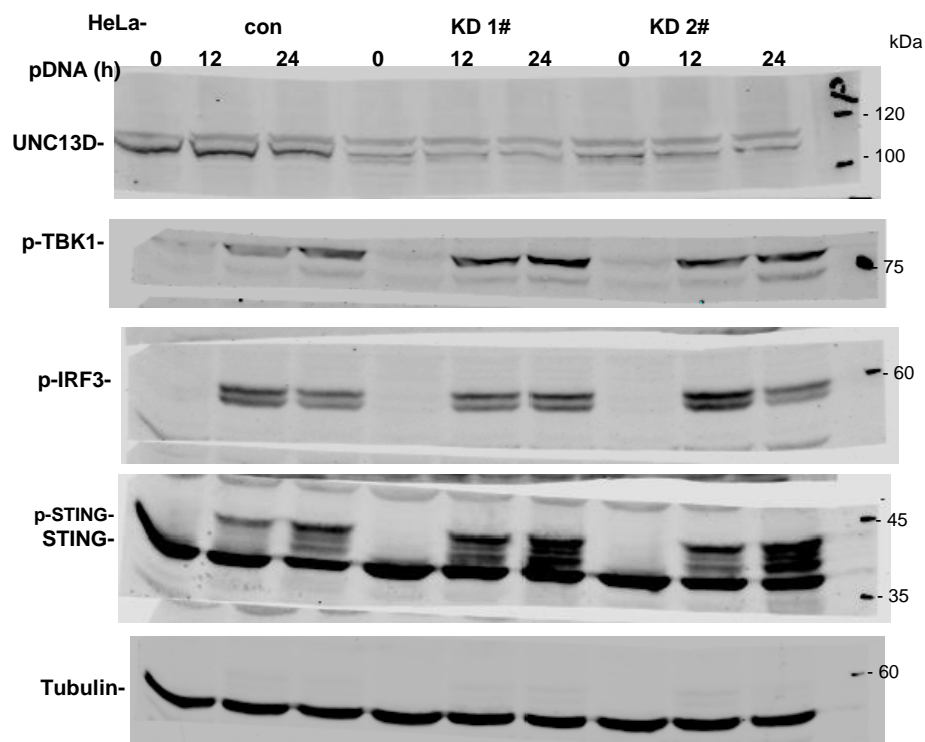

## Source Data for Fig 1H

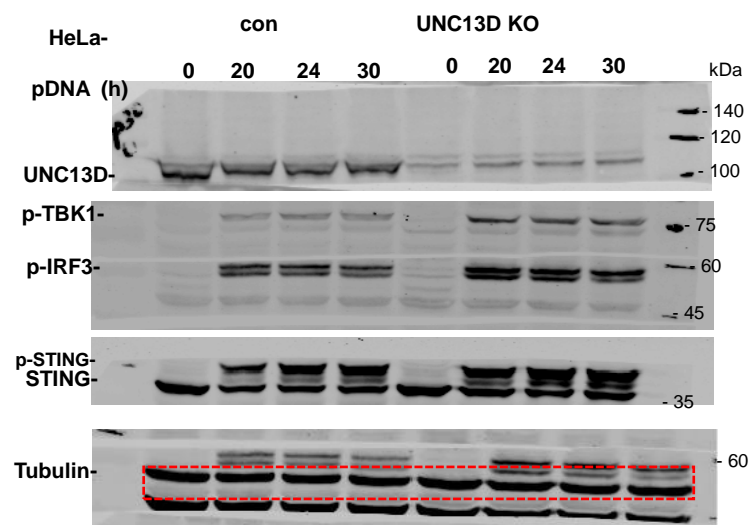

## Source Data for Fig 1I

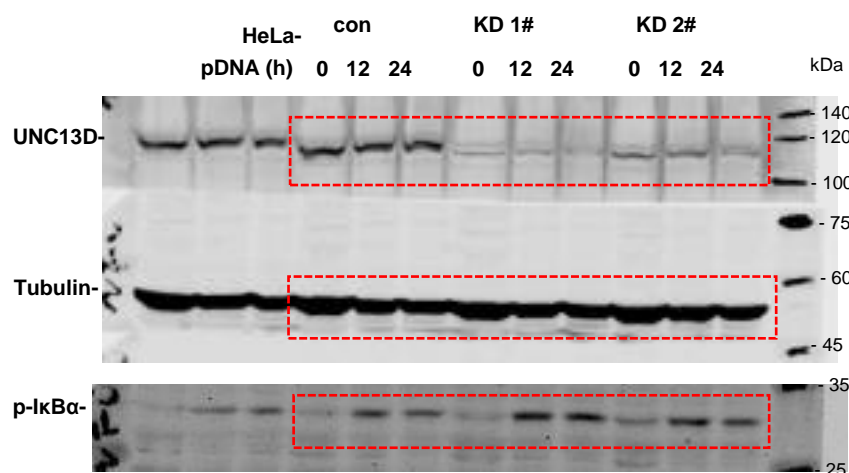

## Source Data for Fig 1J

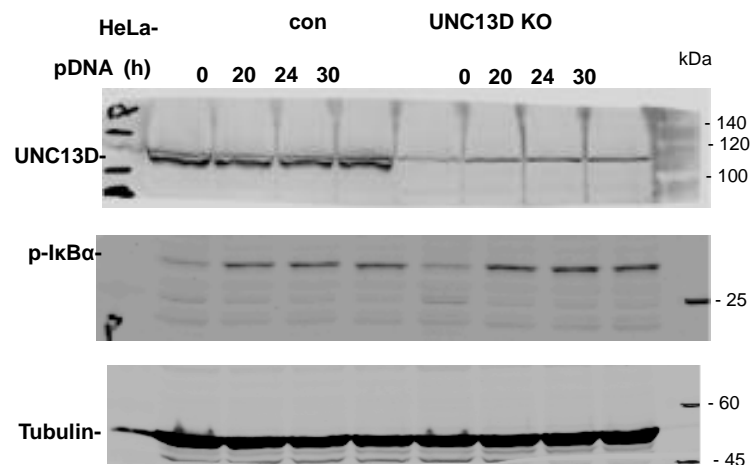

## Source Data for Fig 1K

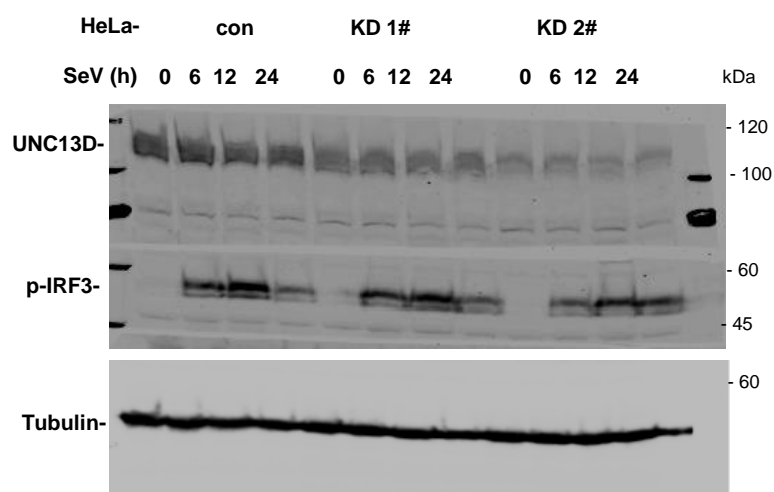

## Source Data for Fig 1L

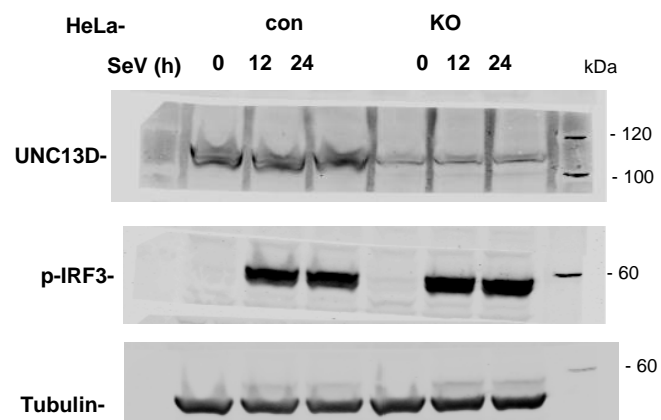

Supplement: EMBR-23-e55099-s009.pdf [file EMBR-23-e55099-s009.pdf]
